# Supplementary material for: Role of Different Fuels and Sintering Temperatures in the Structural, Optical, Magnetic, and Photocatalytic Properties of Chromium-Containing Nickel Ferrite: Kinetic Study of Photocatalytic Degradation of Rhodamine B Dye
Source: PubMed Central journal article supplement — ACS Omega. 2023 Feb 8;8(7):6302–17. doi: 10.1021/acsomega.2c06249 (PMC9947983; doi:10.1021/acsomega.2c06249), 2023-02-08
Supplement: ao2c06249_si_001.pdf [file ao2c06249_si_001.pdf]

**Role of different fuels and sintering temperature on structural, optical, magnetic and photocatalytic properties of chromium containing nickel ferrite: kinetic study of photocatalytic degradation of rhodamine B dye**

Sumit Singh, Amit Kumar Atri, Irfan Qadir, Shikha Sharma, Ujwal Manhas and  
Devinder Singh\*

Department of Chemistry, University of Jammu, Jammu, India

---

email: [drdssambyal@rediffmail.com](mailto:drdssambyal@rediffmail.com) (Corresponding Author: Devinder Singh)

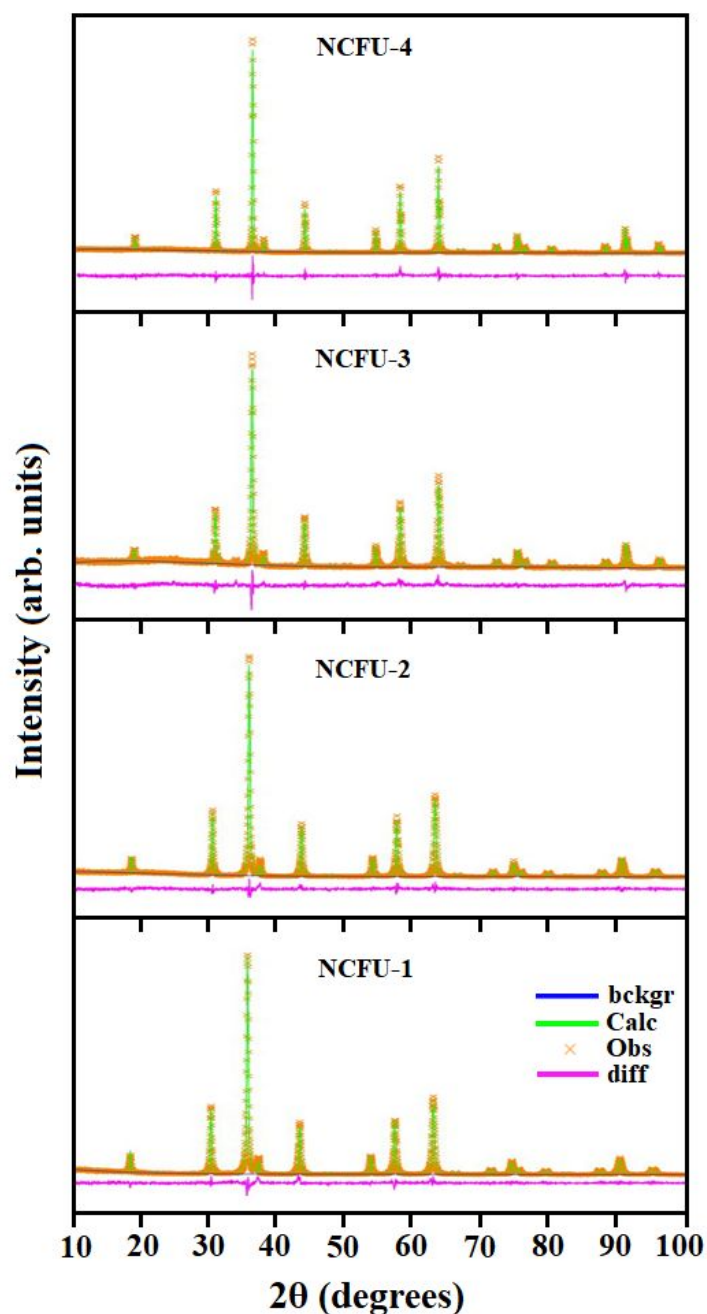

**Figure S1.**  
refinement plot of

Rietveld  
NCFU's

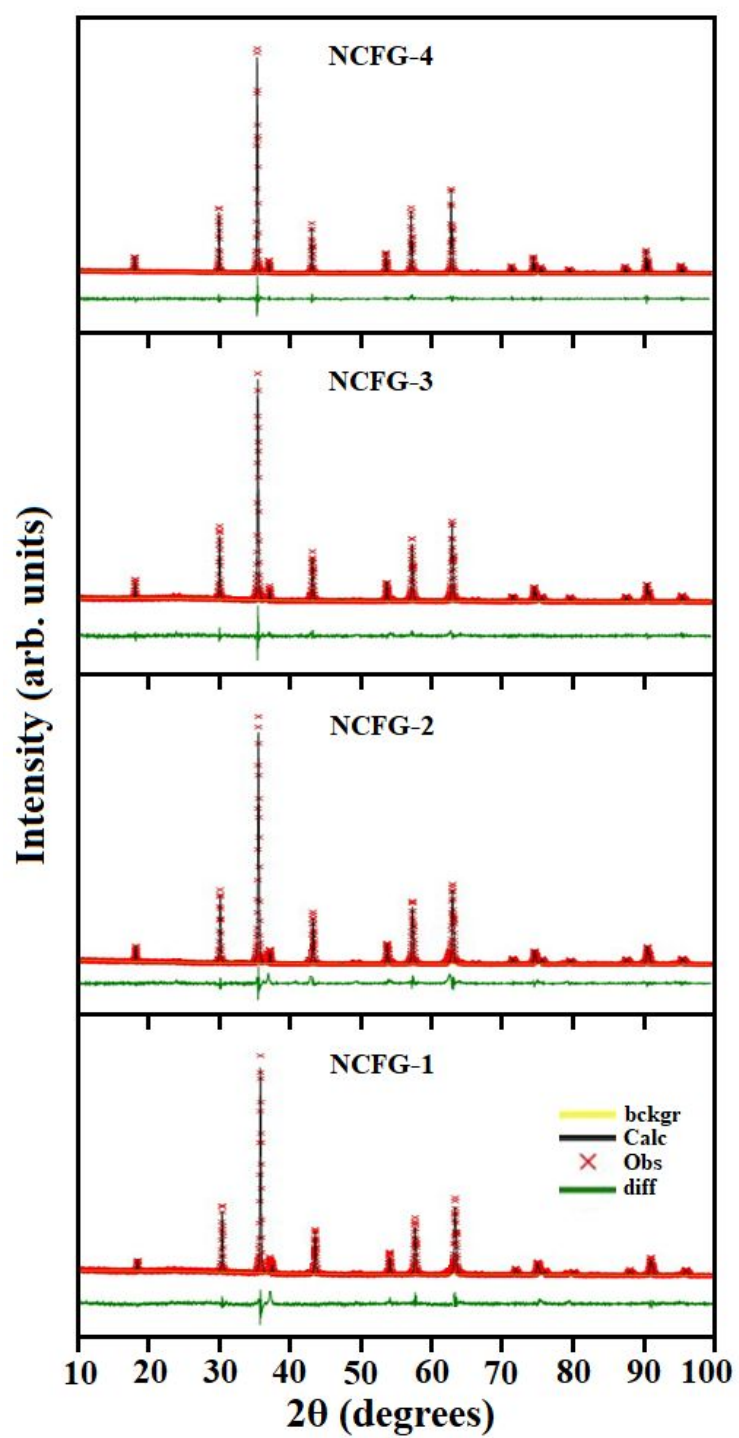

**Figure S2.** Rietveld refinement plot of NCFG's

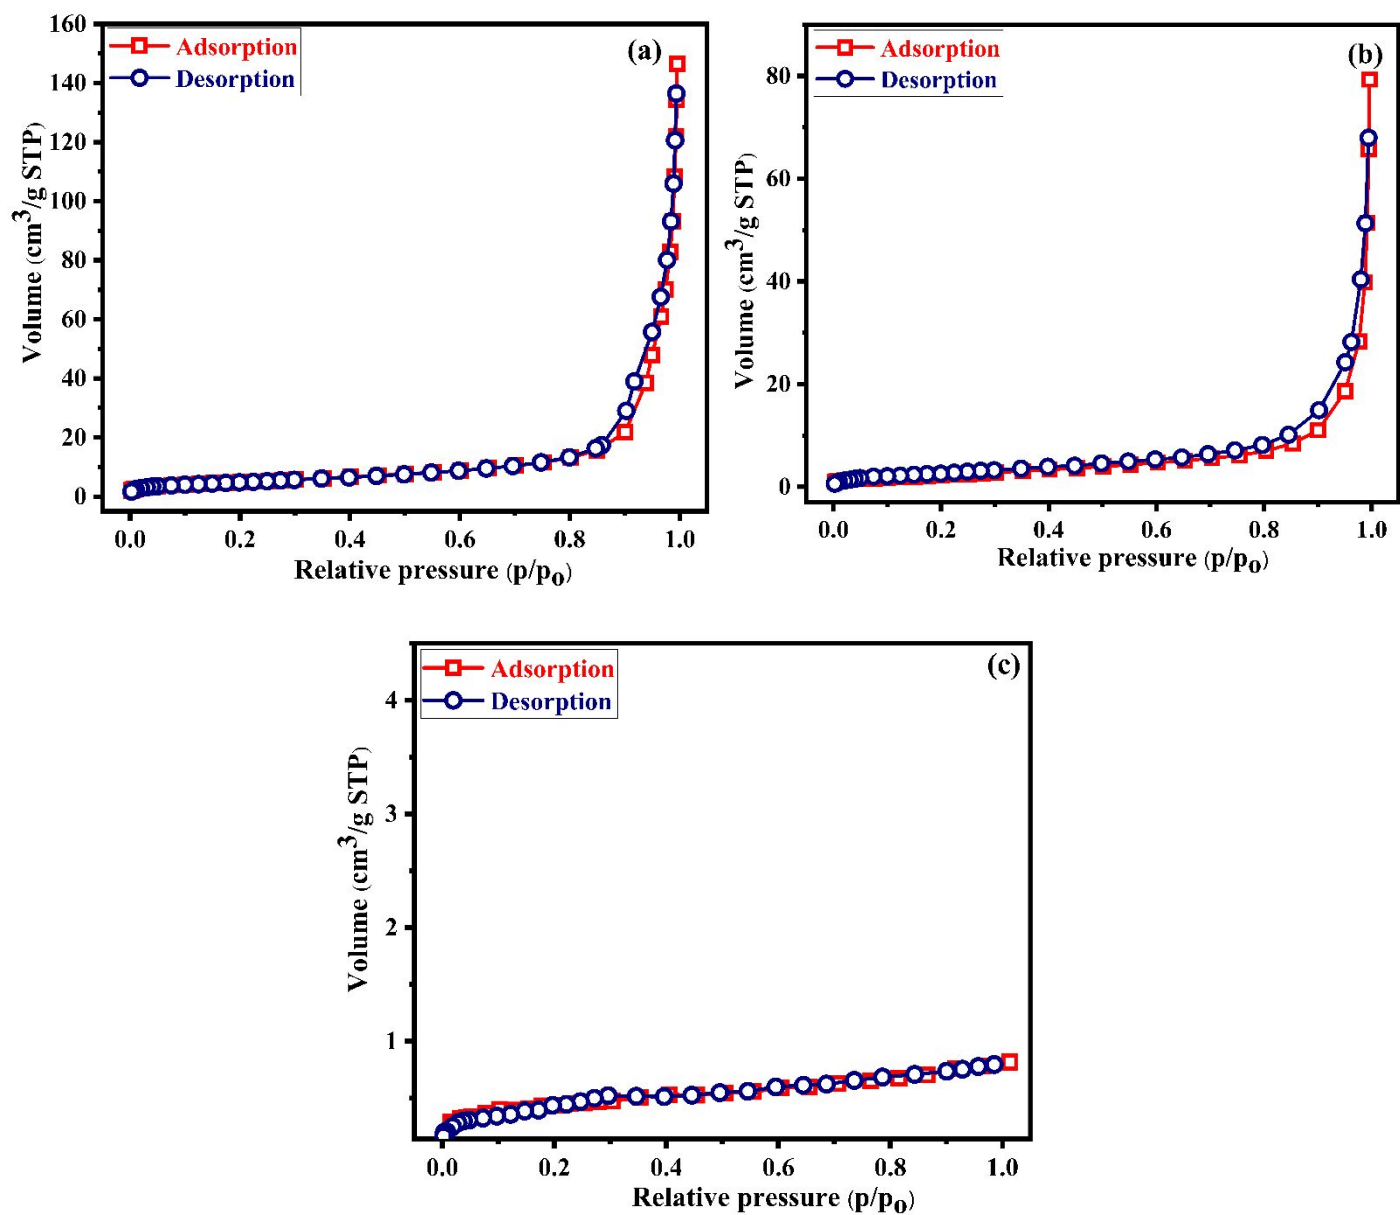

**Figure S3.**  $N_2$  Adsorption-Desorption isotherm for (a) NCFP-2, (b) NCFU-2, (c) NCFG-2

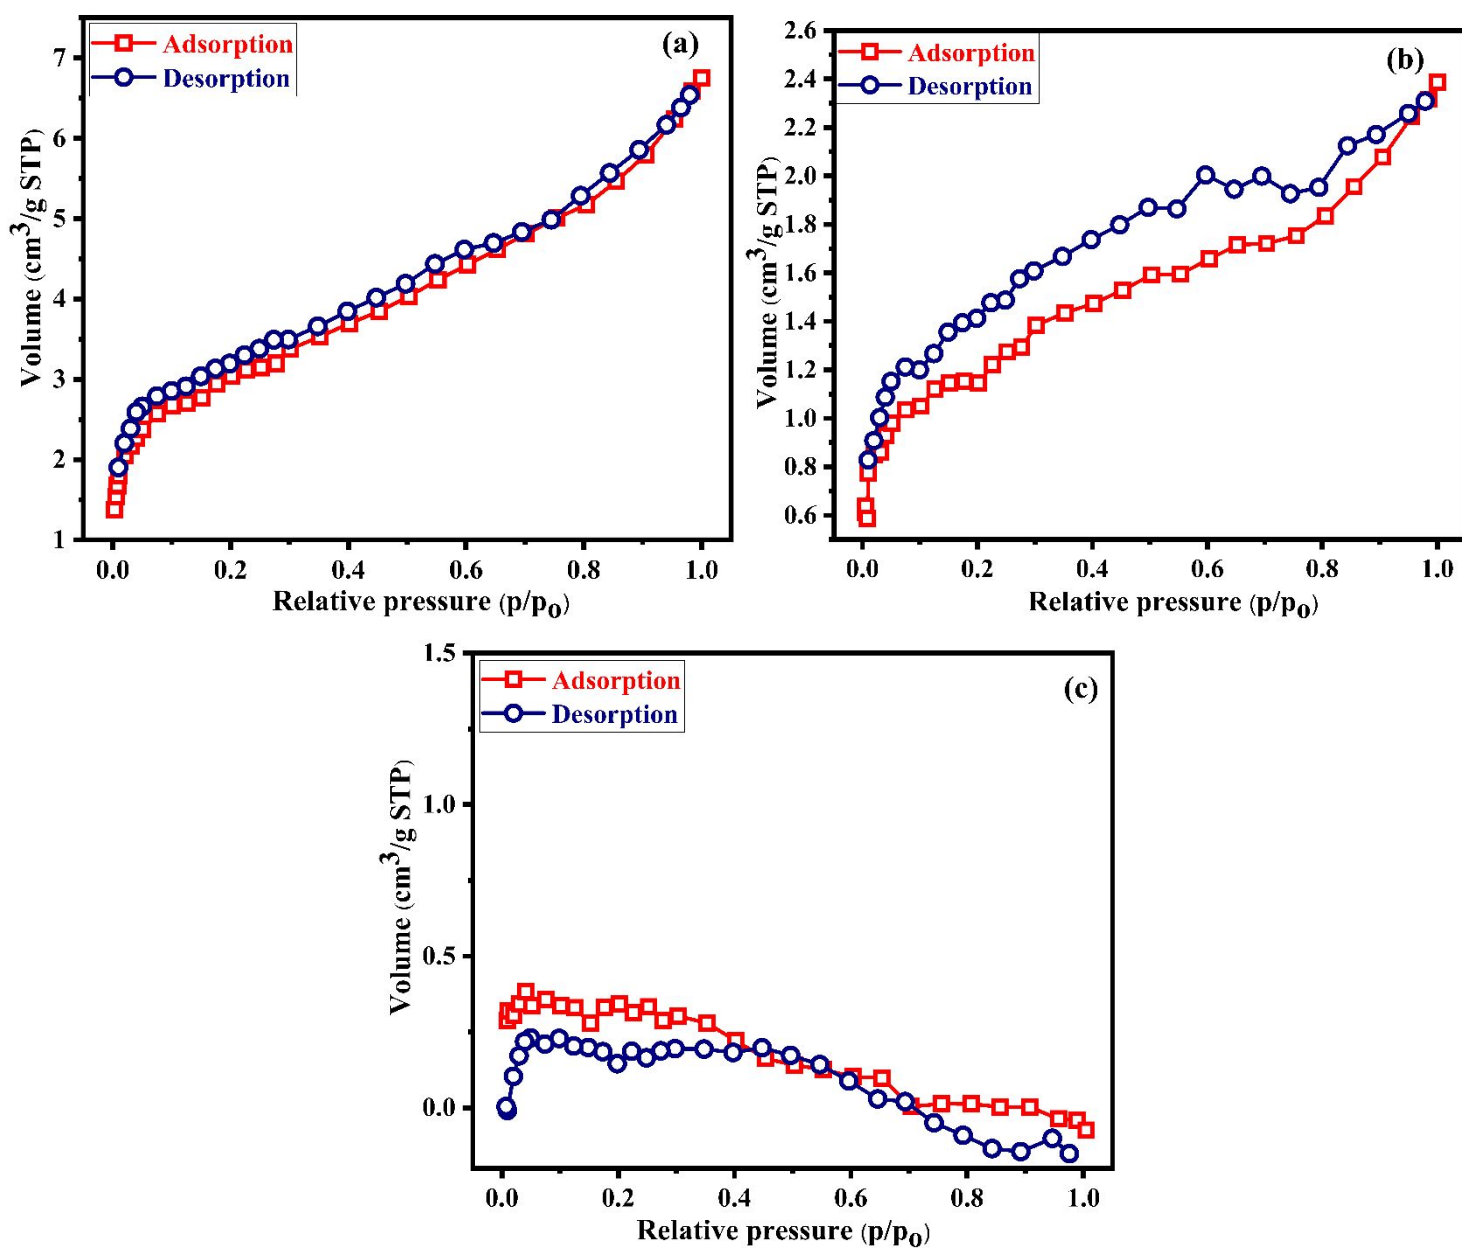

**Figure S4.** N<sub>2</sub> Adsorption-Desorption isotherm for (a) NCFP-3, (b) NCFU-3, (c) NCFG-3

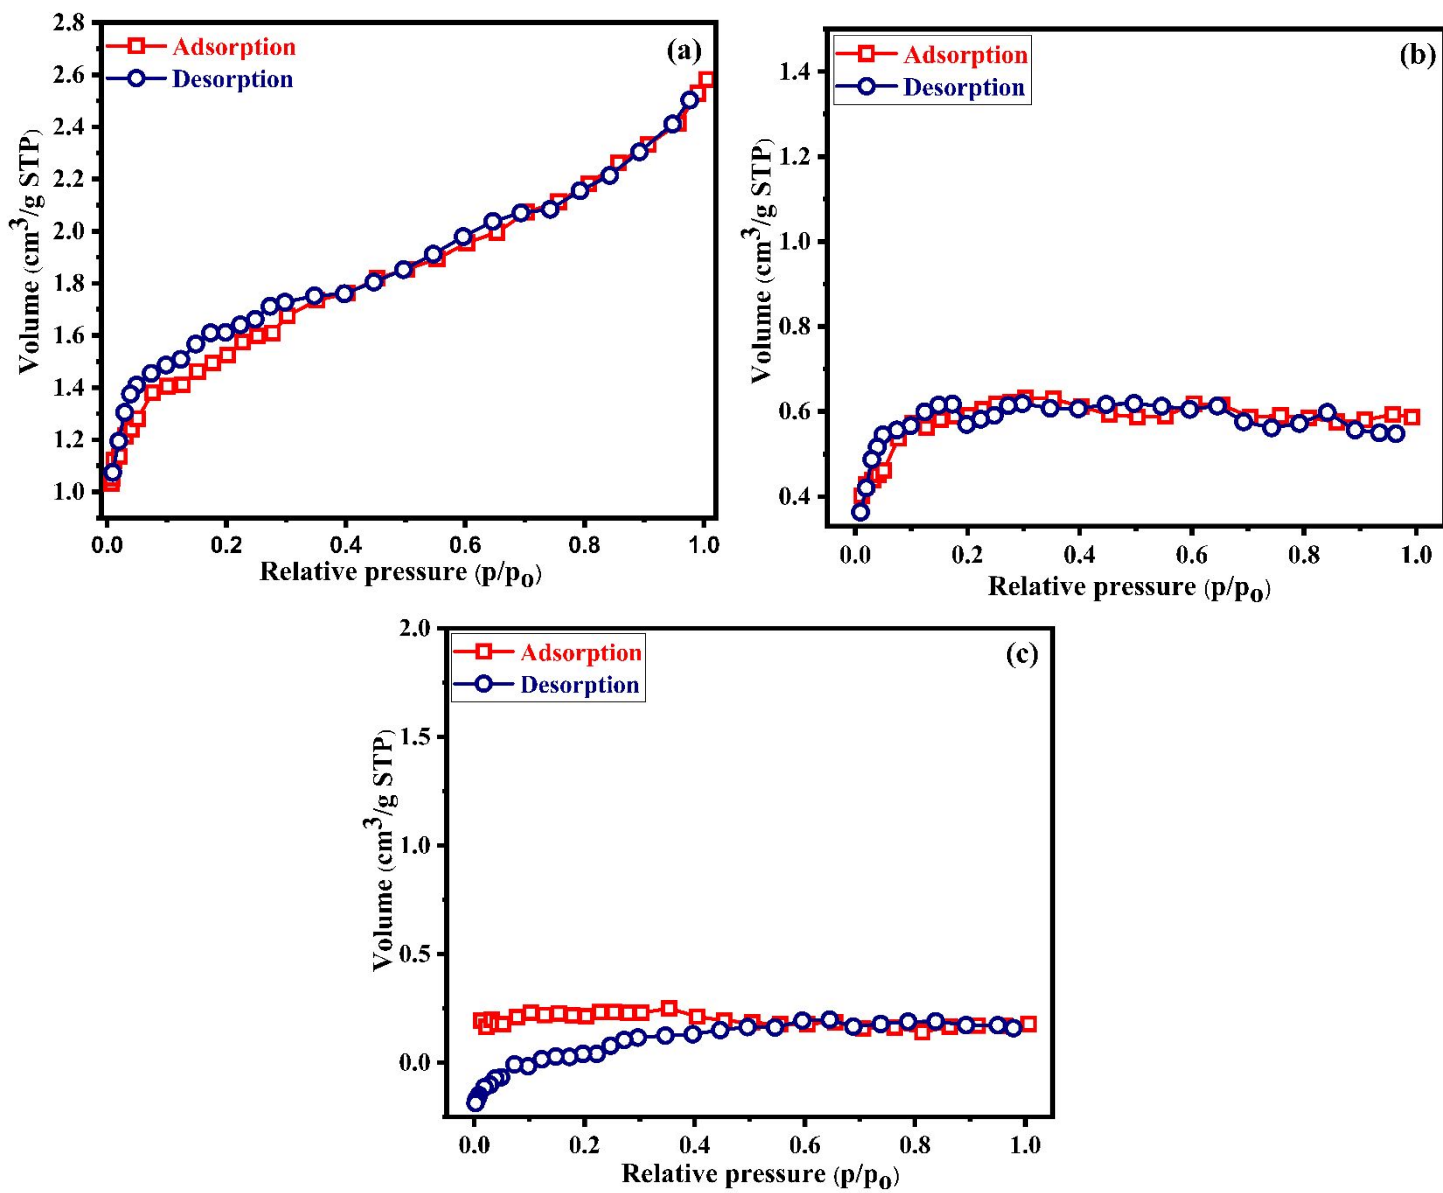

**Figure S5.**  $N_2$  Adsorption-Desorption isotherm for (a) NCFP-4, (b) NCFU-4, (c) NCFG-4.

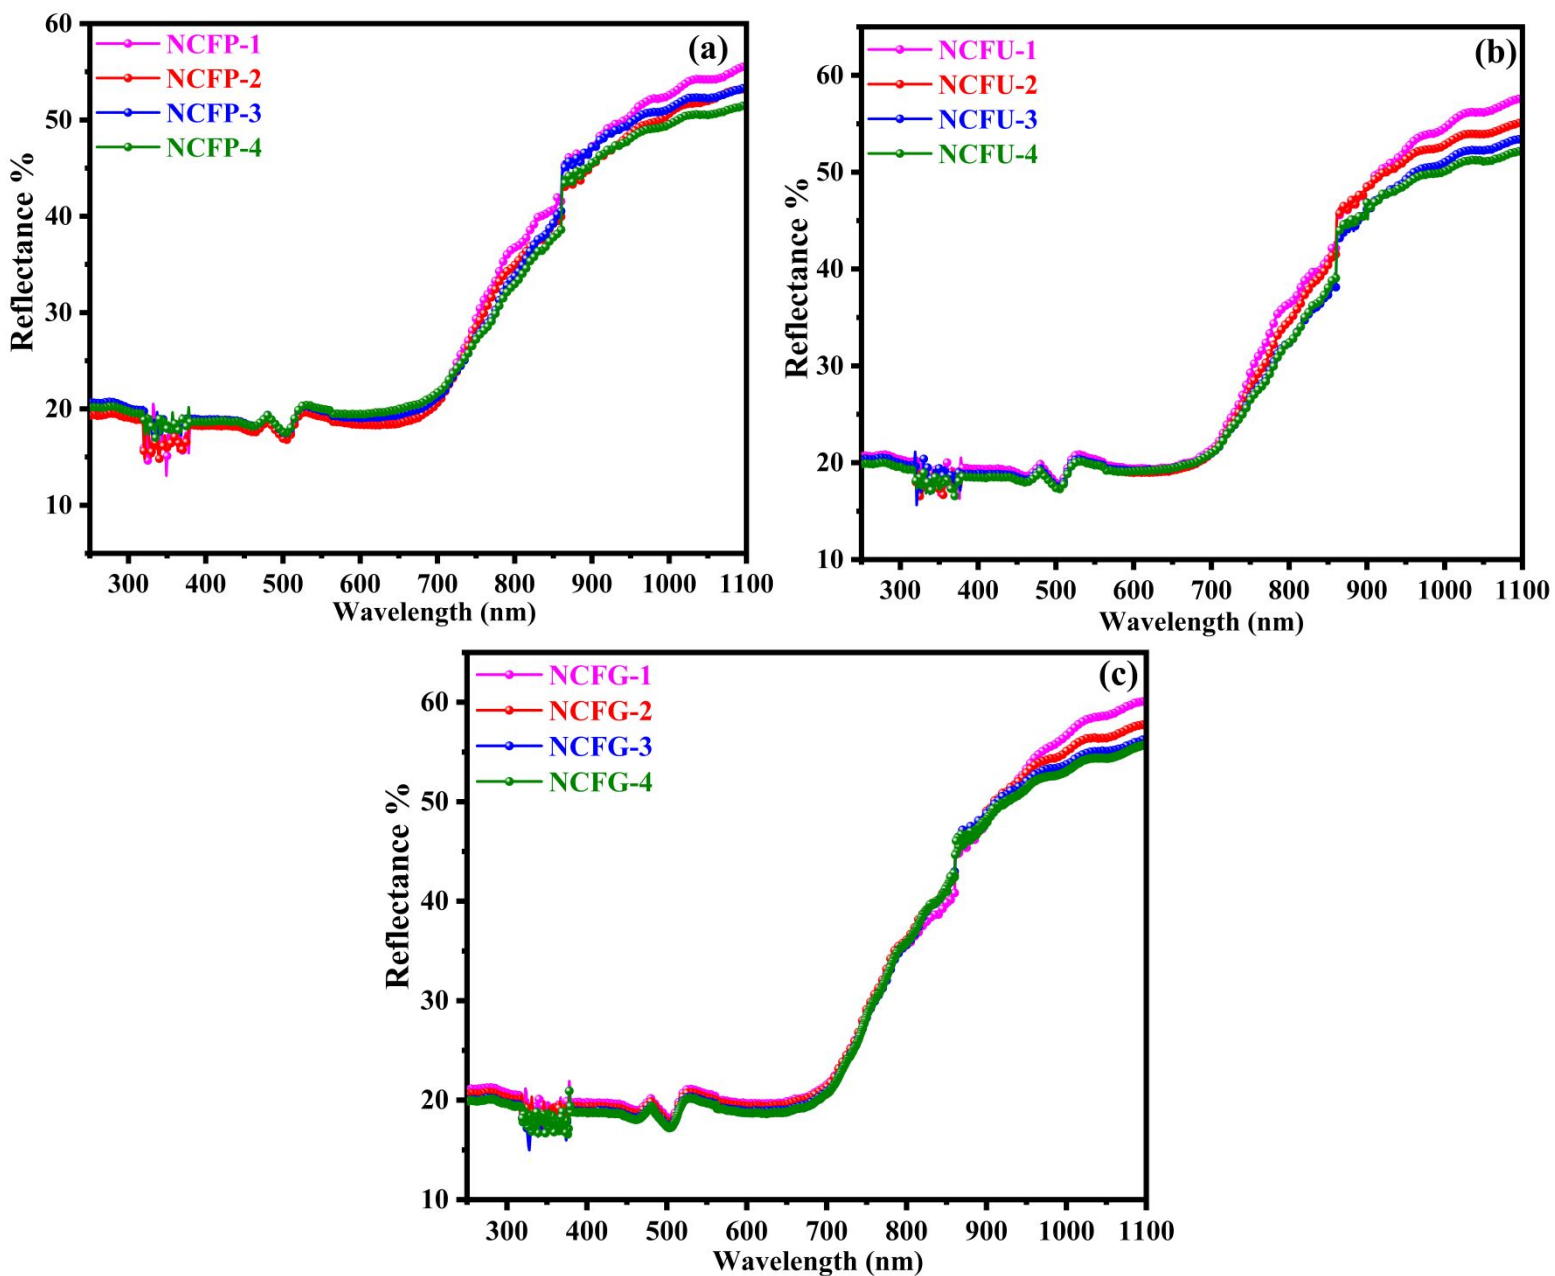

**Figure S6.** Diffuse reflectance spectra (DRS) spectra of Ni-Cr ferrites nanoparticles (a) NCFP's, (b) NCFU's, and (c) NCFG's

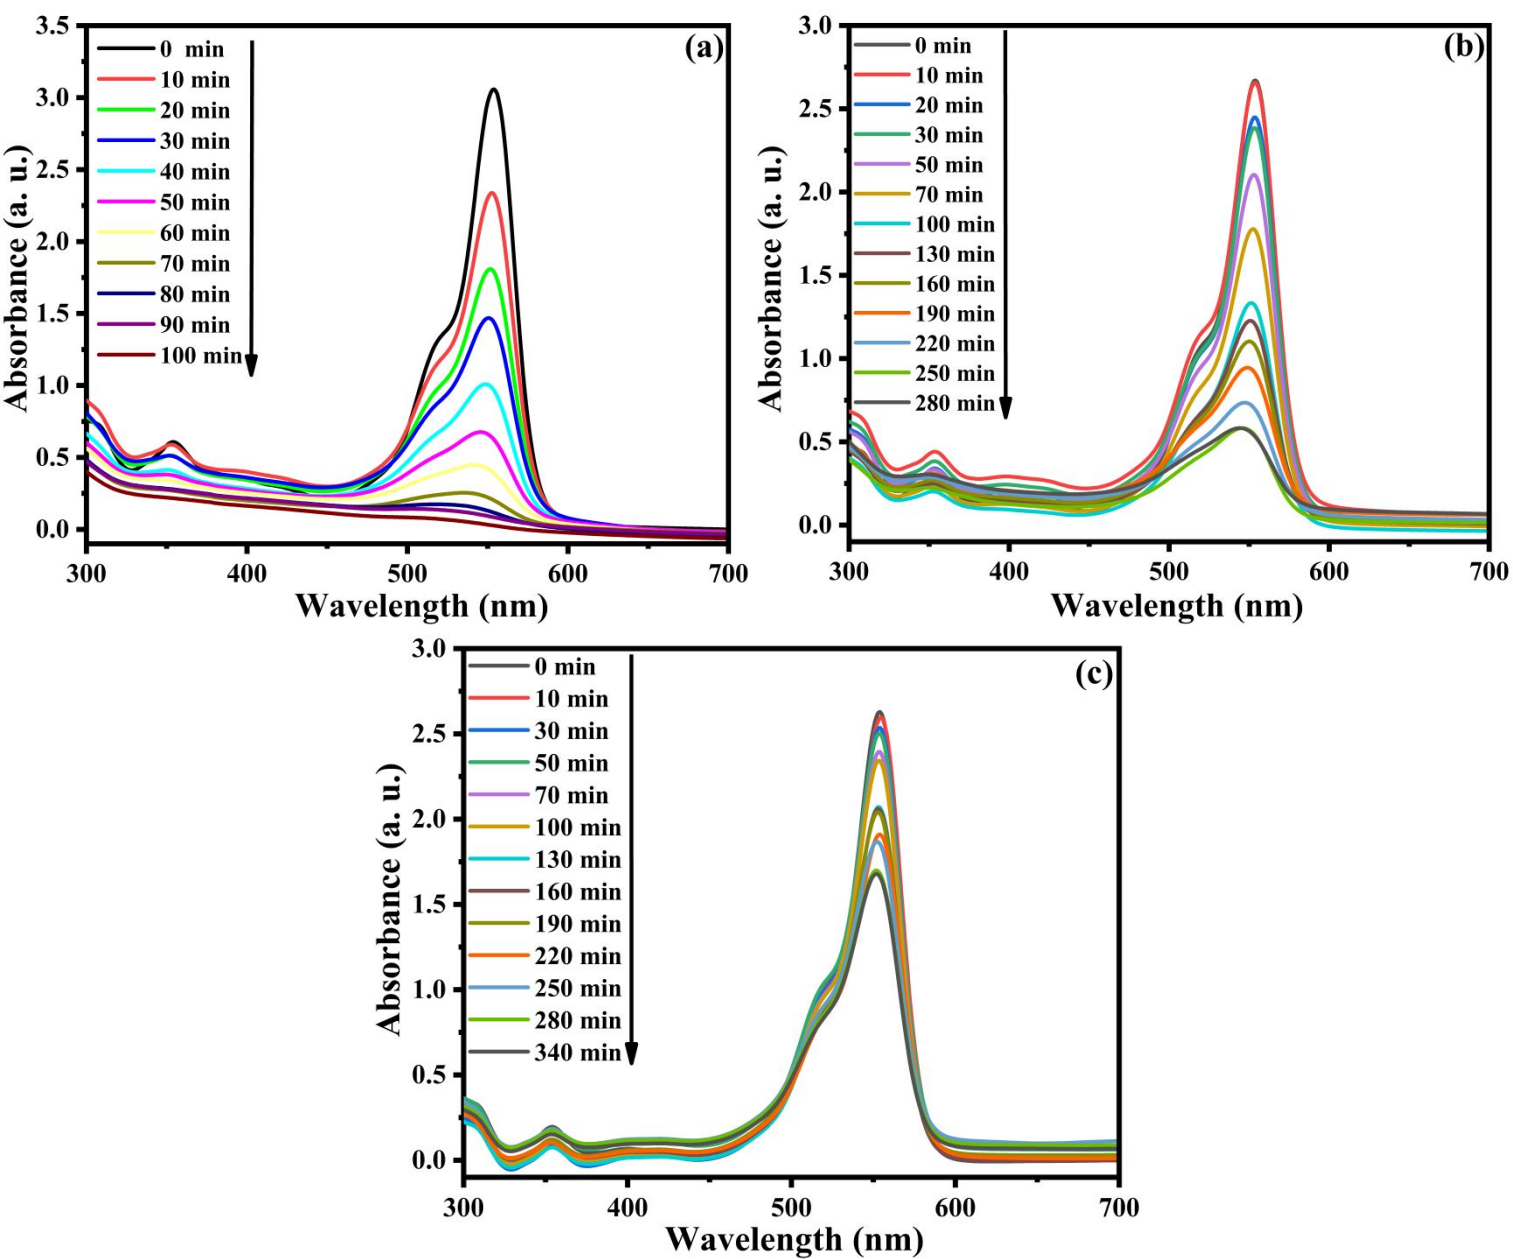

**Figure S7.** Time dependent UV-Vis spectra of degradation of RhB in the presence of (a) NCFP-2, (b) NCFU-2, (c) NCFG-2 as photocatalyst



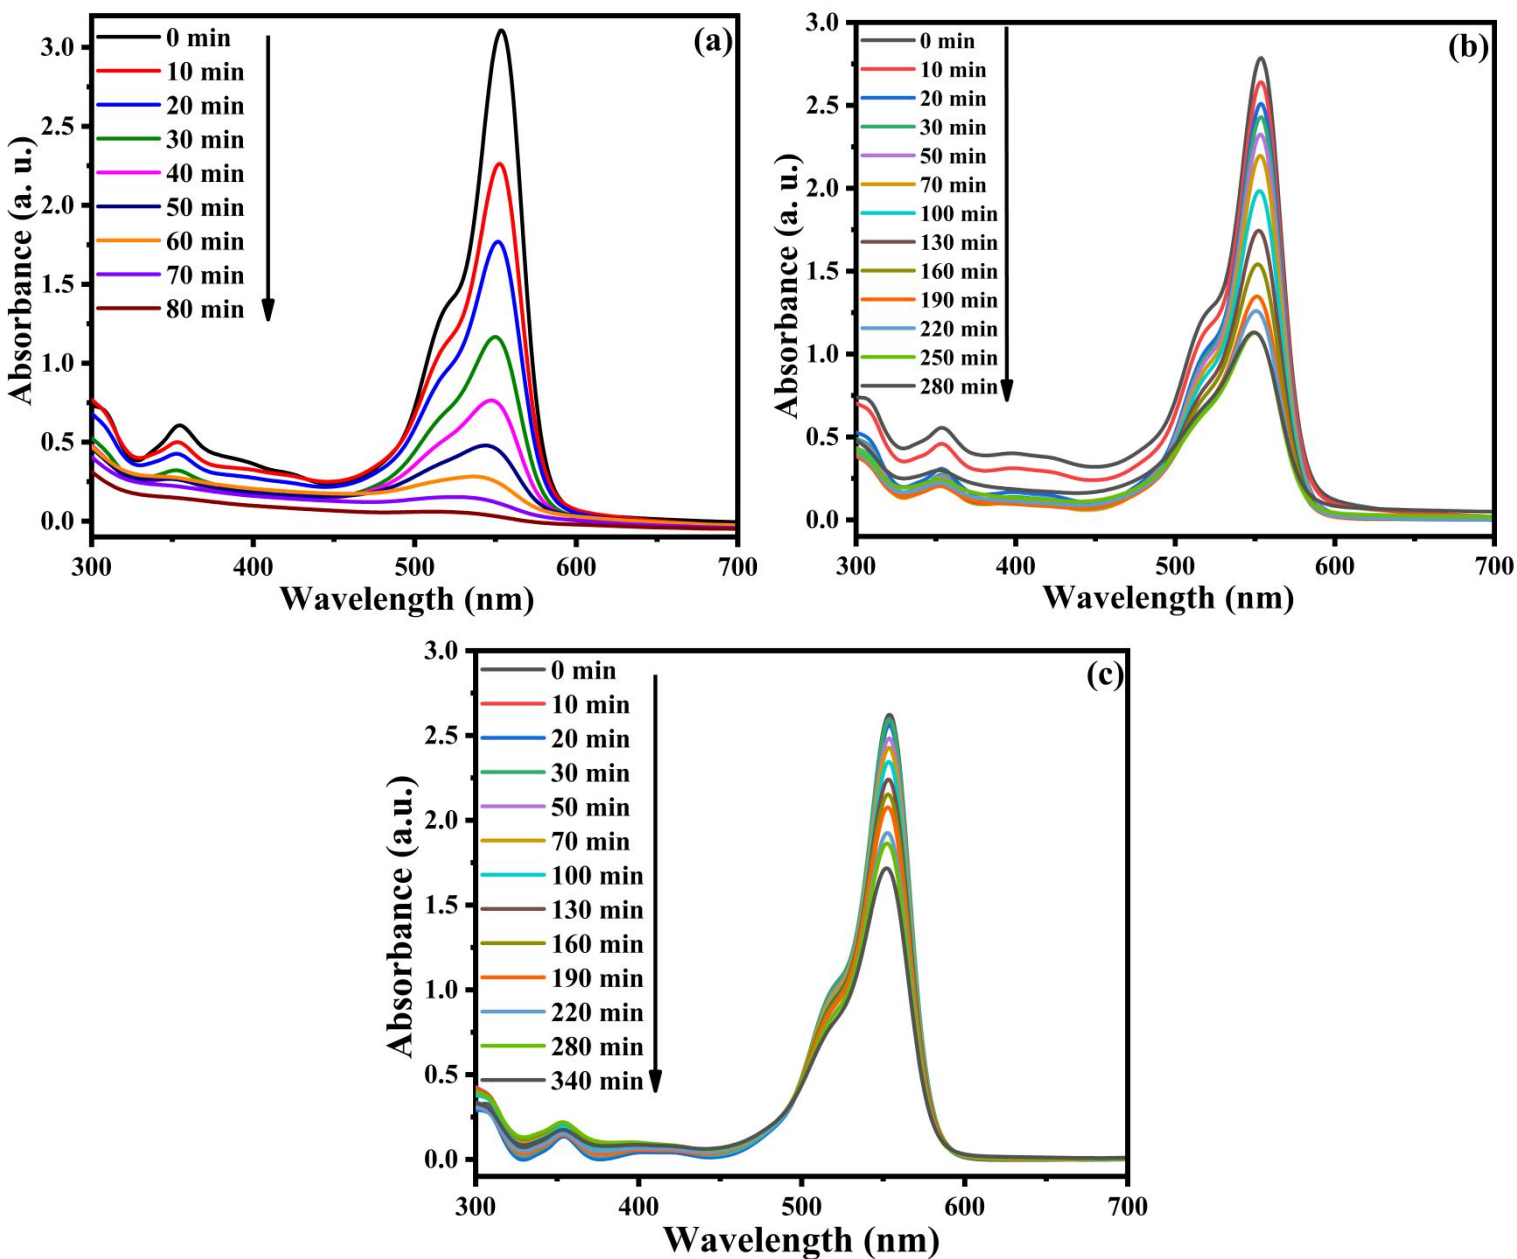

**Figure S8.** Time dependent UV-Vis spectra of degradation of RhB in the presence of (a) NCFP-3, (b) NCFU-3, (c) NCFG-3 as photocatalyst

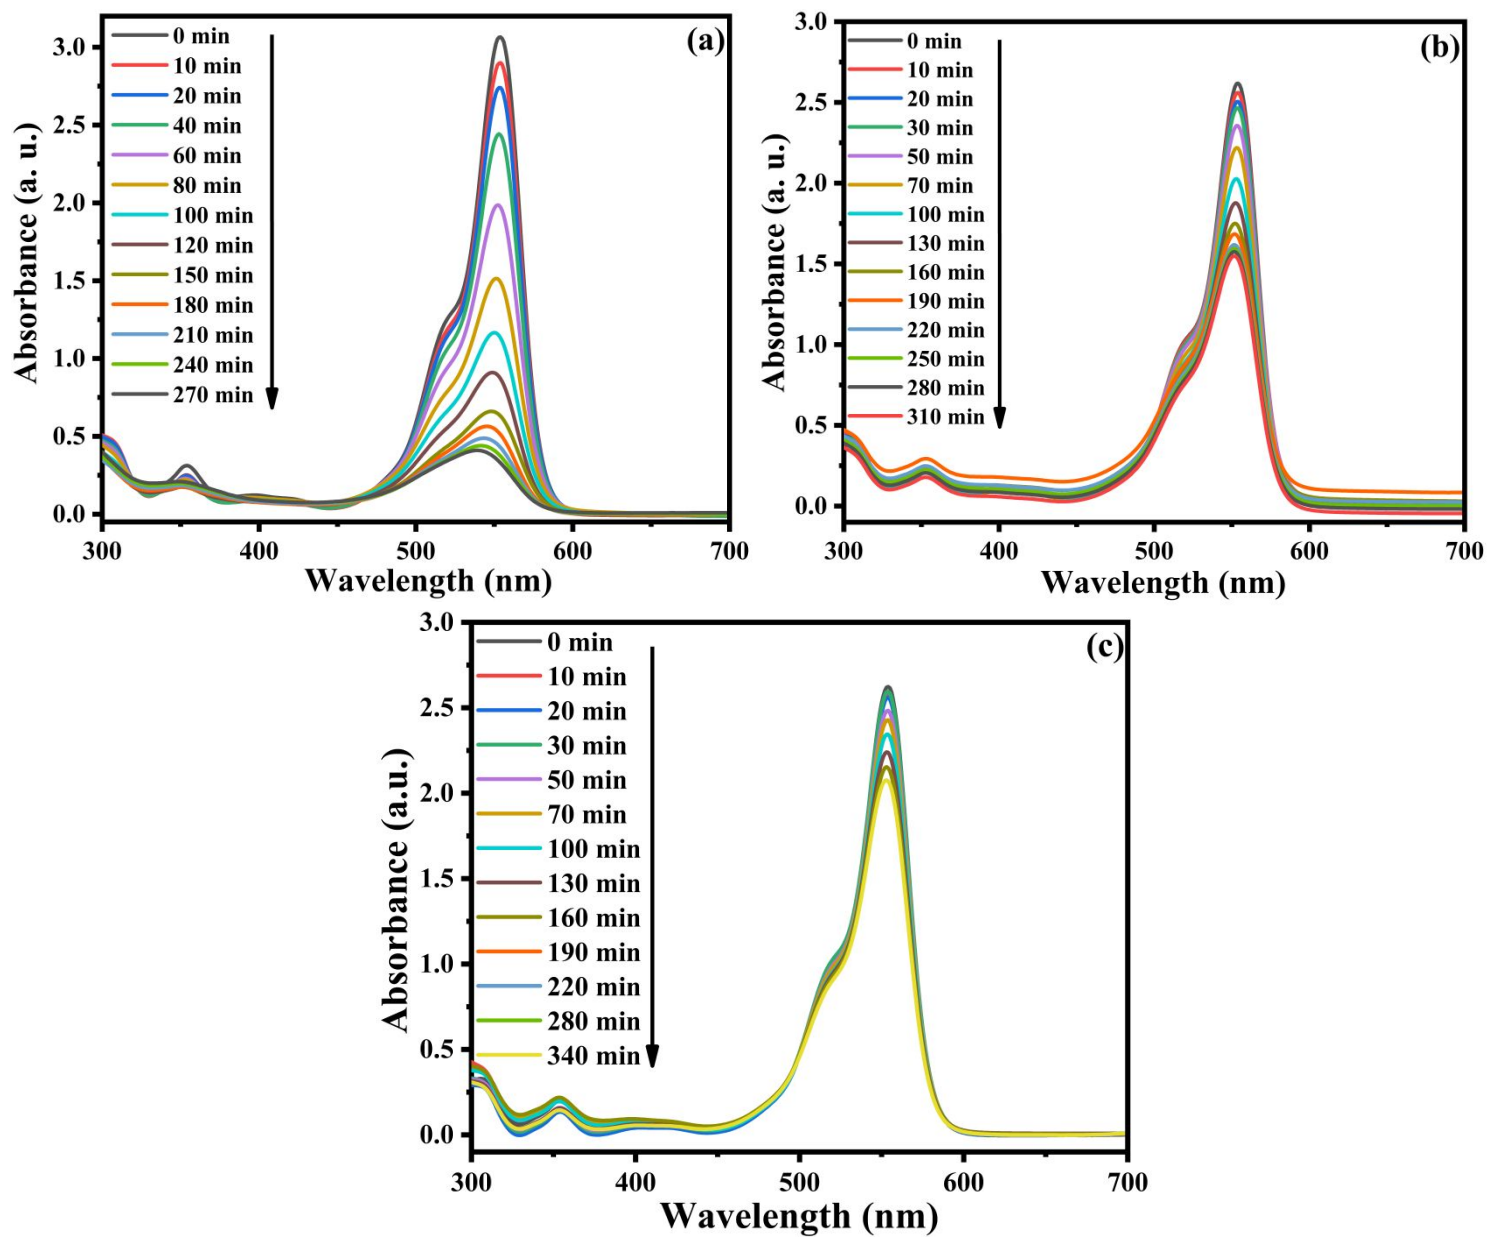

**Figure S9.** Time dependent UV-Vis spectra of degradation of RhB in the presence of (a) NCFP-4, (b) NCFU-4, (c) NCFG-4 as photocatalyst

**Table S1.** EDX analysis of NCFP-1 before and after use.

| Elements | NCFP-1                       |                             |
|----------|------------------------------|-----------------------------|
|          | Expt. mass %<br>(before use) | Expt. Mass %<br>(after use) |
| Ni       | 24.00                        | 23.76                       |
| Fe       | 24.98                        | 25.78                       |
| Cr       | 25.96                        | 24.45                       |
| O        | 25.07                        | 26.01                       |
